# Supplementary material for: Ultrastable red-emitting phosphor-in-glass for superior high-power artificial plant growth LEDs
Source: Royal Society of Chemistry journal article supplement (doi:10.1039/c7tc05250b), 2018-01-01
Supplement: c7tc05250b1.pdf [file c7tc05250b1.pdf]

**Electronic Supplementary Information to:**

**Ultrastable Red-emitting Phosphor-in-glass for Superior High-power  
Artificial Plant Growth LEDs**

Jiankun Deng,<sup>a</sup> Haoran Zhang,<sup>a</sup> Xuejie Zhang,<sup>a</sup> Yinjian Zheng,<sup>a,b</sup> Junqiang Yuan,<sup>a</sup> Hongzhong Liu,<sup>a</sup>  
Yingliang Liu,<sup>\*a</sup> Bingfu Lei<sup>\*a,b</sup> and Jianbei Qiu<sup>c</sup>

<sup>a</sup>Guangdong Provincial Engineering Technology Research Center for Optical Agriculture, College  
of Materials and Energy, South China Agricultural University, Guangzhou 510642, China

<sup>b</sup>College of Horticulture, South China Agricultural University, Guangzhou 510642, China

<sup>c</sup> Faculty of Materials Science and Engineering, Kunming University of Science and Technology,  
Kunming, 650093, China

*\*Corresponding authors. E-mail: tliuyl@scau.edu.cn, tleibf@scau.edu.cn.*

**Table S1.** CIE coordinates of 6 wt% MMG:Mn<sup>4+</sup>-PiG and MMG:Mn<sup>4+</sup> phosphor at different temperatures.

| T (°C) | CIE (X, Y)     |                |
|--------|----------------|----------------|
|        | PiG            | Phosphor       |
| 30     | (0.710, 0.290) | (0.710, 0.290) |
| 60     | (0.709, 0.291) | (0.709, 0.291) |
| 90     | (0.709, 0.291) | (0.708, 0.292) |
| 120    | (0.708, 0.292) | (0.707, 0.293) |
| 150    | (0.707, 0.293) | (0.706, 0.294) |
| 180    | (0.706, 0.294) | (0.706, 0.294) |
| 210    | (0.706, 0.294) | (0.705, 0.295) |

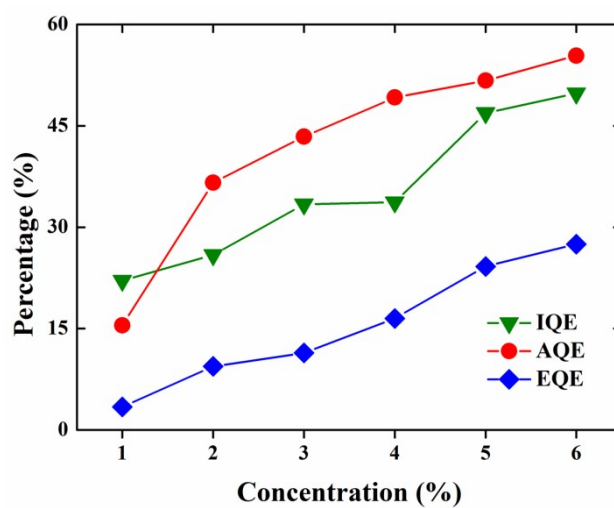

**Figure S1.** Dependence of IQE, AQE and EQE on phosphor doping concentration in MMG:Mn<sup>4+</sup>-PiG.

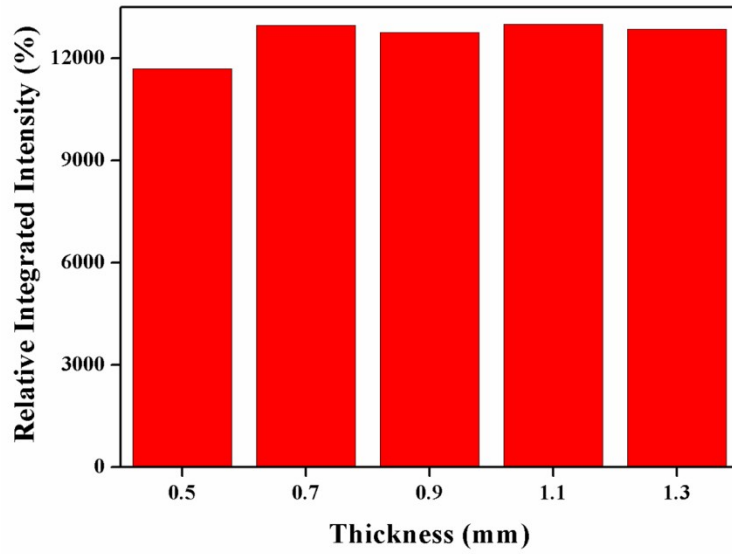

**Figure S2.** The relative integrated PL intensity of 6 wt% MMG:Mn<sup>4+</sup>-PiG versus various thicknesses from 0.5 to 1.3 mm.

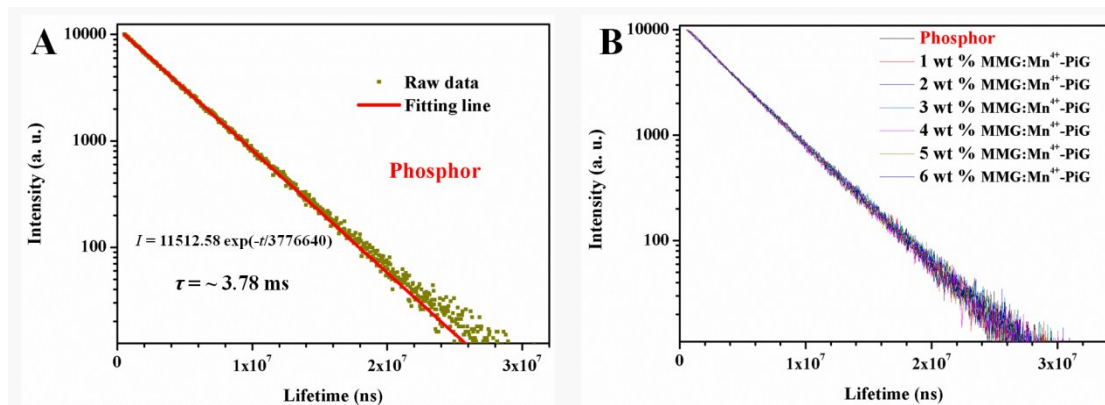

**Figure S3.** The decay curves of (A) MMG:Mn<sup>4+</sup> phosphor and (B) MMG:Mn<sup>4+</sup>-PiG with different phosphor doping concentrations.

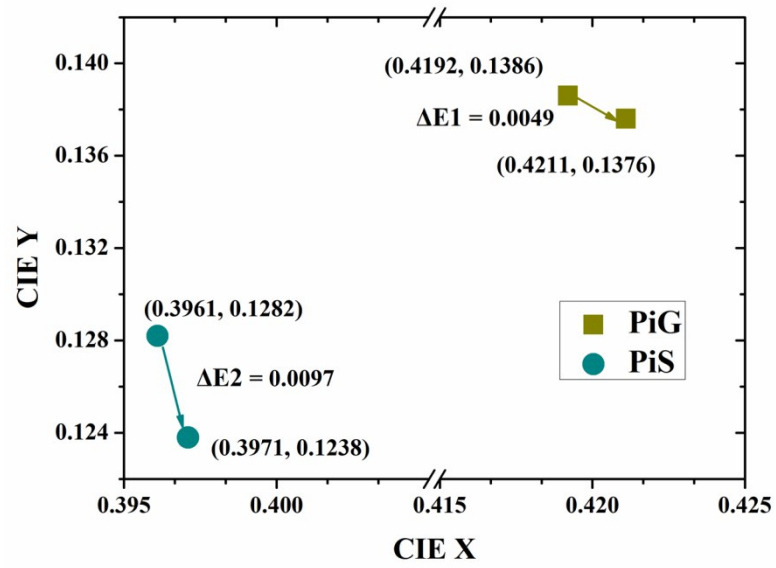

**Figure S4.** The variation of CIE color coordinates of 6 wt% MMG:Mn<sup>4+</sup>-PiG (thickness = 1.1 mm) and PiS based LED-PGLs before and after 12-hour continuous operation test at an current of 300 mA.
